# Supplementary material
Source: Frontiers journal article supplement (https://www.frontiersin.org/articles/276212)
Supplement: Appendix_B.pdf [file Appendix_B.pdf]

1 **Appendix B**

2 *The Workaholism Facet-Based Scale (WFBS) measure*

3

4 Please read the sentences below and indicate the extent to which an internal drive "compels" you to:

|       |            |                                                                                                                                  | <b>Strongly<br/>disagree</b> | <b>Disagree</b> | <b>Somewhat<br/>disagree</b> | <b>Somewhat<br/>agree</b> | <b>Agree</b> | <b>Strongly<br/>agree</b> |
|-------|------------|----------------------------------------------------------------------------------------------------------------------------------|------------------------------|-----------------|------------------------------|---------------------------|--------------|---------------------------|
| a1-b1 | <b>1.</b>  | Think about the job all the time.                                                                                                | 1                            | 2               | 3                            | 4                         | 5            | 6                         |
| a1-b2 | <b>2.</b>  | Invest vast cognitive effort regarding your job (e.g.: planning, examining alternatives for problem solving in the job, etc.)    | 1                            | 2               | 3                            | 4                         | 5            | 6                         |
| a2-b1 | <b>3.</b>  | Feel frustrated if you need to stay at work beyond the formal working hours. <b>(R)</b>                                          | 1                            | 2               | 3                            | 4                         | 5            | 6                         |
| a2-b2 | <b>4.</b>  | Feel bitter when you need to invest a lot of effort in your work. <b>(R)</b>                                                     | 1                            | 2               | 3                            | 4                         | 5            | 6                         |
| a3-b1 | <b>5.</b>  | Work long hours, even beyond the role's requirements.                                                                            | 1                            | 2               | 3                            | 4                         | 5            | 6                         |
| a3-b2 | <b>6.</b>  | Work very diligently.                                                                                                            | 1                            | 2               | 3                            | 4                         | 5            | 6                         |
| a1-b1 | <b>7.</b>  | Think constantly about job-related issues (e.g.: while driving, on holidays and rest days, etc.).                                | 1                            | 2               | 3                            | 4                         | 5            | 6                         |
| a1-b2 | <b>8.</b>  | Invest much thought regarding your work, even when you wish to disengage from it.                                                | 1                            | 2               | 3                            | 4                         | 5            | 6                         |
| a2-b1 | <b>9.</b>  | Feel anxiety if you are not occupied all day long.                                                                               | 1                            | 2               | 3                            | 4                         | 5            | 6                         |
| a2-b2 | <b>10.</b> | Feel ecstatic when you need to invest much effort at work.                                                                       | 1                            | 2               | 3                            | 4                         | 5            | 6                         |
| a3-b1 | <b>11.</b> | Arrive very early to work, and leave very late.                                                                                  | 1                            | 2               | 3                            | 4                         | 5            | 6                         |
| a3-b2 | <b>12.</b> | Work very intensely.                                                                                                             | 1                            | 2               | 3                            | 4                         | 5            | 6                         |
| a1-b1 | <b>13.</b> | Think long about work issues.                                                                                                    | 1                            | 2               | 3                            | 4                         | 5            | 6                         |
| a1-b2 | <b>14.</b> | Positively perceive a role in which you can infuse effort, regardless of the interest that may derive from the tasks themselves. | 1                            | 2               | 3                            | 4                         | 5            | 6                         |
| a2-b1 | <b>15.</b> | Feel disappointed when a working day ends earlier than expected.                                                                 | 1                            | 2               | 3                            | 4                         | 5            | 6                         |
| a2-b2 | <b>16.</b> | Feel enthusiastic about working days, which require heavy work investment.                                                       | 1                            | 2               | 3                            | 4                         | 5            | 6                         |
| a3-b1 | <b>17.</b> | Work all the time, even on breaks (e.g.: lunch breaks, smoking breaks, etc.)                                                     | 1                            | 2               | 3                            | 4                         | 5            | 6                         |
| a3-b2 | <b>18.</b> | Invest a large amount of effort in executing job tasks.                                                                          | 1                            | 2               | 3                            | 4                         | 5            | 6                         |

5 *Notes:* The left-most column shows the structuples based on the mapping sentence. An (R) symbol refers to  
6 reverse-coded items.
